# Supplementary material for: Labdane Diterpenoids from Salvia tingitana Etl. Synergize with Clindamycin against Methicillin-Resistant Staphylococcus aureus
Source: MDPI journal article supplement (doi:10.3390/molecules26216681), 2021-11-04
Supplement: s1 [file s1]

# Labdane Diterpenoids from *Salvia tingitana* Etl. Synergize with Clindamycin against Methicillin-Resistant *Staphylococcus aureus*

Valeria Iobbi <sup>1</sup>, Paola Brun <sup>2</sup>, Giulia Bernab  <sup>2</sup>, Rom o Arago Dougu  Kentsop <sup>1,3</sup>, Giuliana Donadio <sup>4</sup>, Barbara Ruffoni <sup>3</sup>, Paola Fossa <sup>1</sup>, Angela Bisio<sup>1,\*</sup>, and Nunziatina De Tommasi <sup>4</sup>

- <sup>1</sup> Department of Pharmacy, University of Genova, Viale Cembrano 4, 16148 Genova, Italy; valeria.iobbi@edu.unige.it (V.I.); paola.fossa@unige.it (P.F.); dougue.kentsop.phd@difar.unige.it (R.A.D.K.);  
<sup>2</sup> Department of Molecular Medicine, University of Padova, Via Gabelli 63, 35121, Padova, Italy; paola.brun.1@unipd.it (P.B.); giulia.bernabe@edu.unife.it (G.B.)  
<sup>3</sup> Consiglio per la Ricerca e la Sperimentazione in Agricoltura–CREA Centro di ricerca Orticoltura e Florovivaismo, 18038, San Remo (IM), Italy; barbara.ruffoni@crea.gov.it  
<sup>4</sup> Department of Pharmacy, University of Salerno, Via Giovanni Paolo II 132, 84084 Salerno, Italy; gdonadio@unisa.it (G.D.); detommasi@unisa.it (N.D.T.)  
\* Correspondence: bisio@difar.unige.it

## CONTENT:

**Figure S1.** Callus of *S. tingitana* developed from leaf explants in dark condition on MS supplemented with different combination of PGRs and 10 mg/L of ascorbic acid after 4 weeks.

**Figure S2.** Callus of *S. tingitana* developed from leaf explants in light condition on MS supplemented with different combination of PGRs and 10 mg/L of ascorbic acid after 4 weeks.

**Figure S3.** FDA staining of *S. tingitana* callus.

**Figure S4.** Effect of different combination of plant growth regulators to *S. tingitana* callus biomass production.

**Figure S5.** Callus of *S. tingitana*.

**Figure S6.** Effect of equimolar concentration of different cytokinins on callus growth.

**Figure S7.** Abietane diterpenoids isolated from the roots of *S. tingitana*.

**Figure S8.** <sup>1</sup>H NMR (600 MHz, CDCl<sub>3</sub>) spectrum of compound **13**.

**Figure S9.** HSQC (600 MHz, CDCl<sub>3</sub>) spectrum of compound **13**.

**Figure S10.** HMBC (600 MHz, CDCl<sub>3</sub>) spectrum of compound **13**.

**Figure S11.** COSY (600 MHz, CDCl<sub>3</sub>) spectrum of compound **13**.

**Figure S12.** Calibration curves obtained for the LC/MS/MS analysis of sclareol (**1**) and manool (**2**) using pure compounds.

**Figure S13.** Binding pose and ligand interaction plot of 4-phenoxyphenol at the conserved AgrA active site.

**Figure S14.** Binding pose and ligand interaction plot of 9H-xanthene-9-carboxylic acid at the conserved AgrA active site.

**Figure S15.** Manool and sclareol interactions with the key residues into the binding cavity.

**Table S1.** Literature survey about the presence of sclareol (**1**) and manool (**2**) in *Salvia* spp.<sup>a</sup> ..... 10

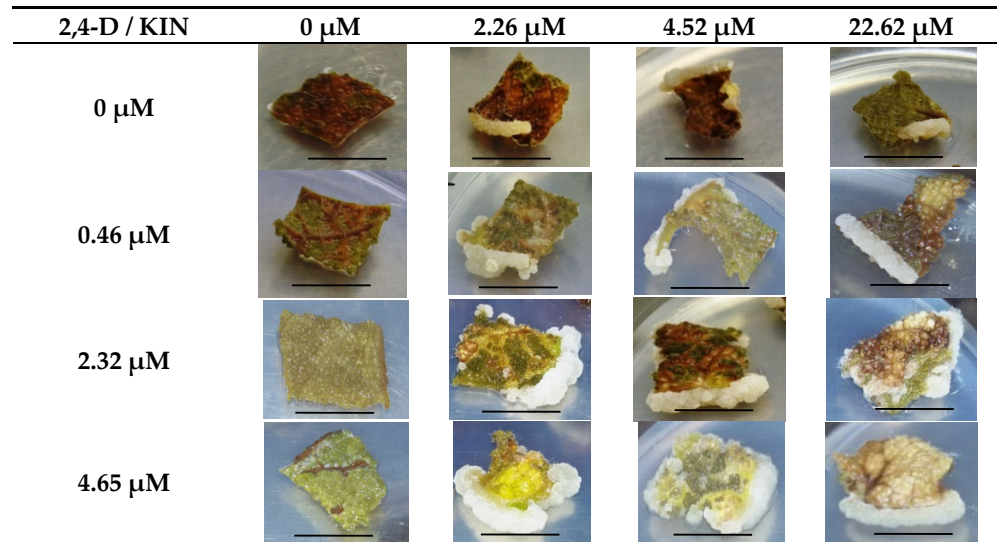

**Figure S1.** Callus of *S. tingitana* developed from leaf explants in dark condition on MS supplemented with different combination of PGRs and 10 mg/L of ascorbic acid after 4 weeks. MS: Murashige and Skoog medium; PGRs: plant growth regulators; 2,4-D: 2,4-dichlorophenoxyacetic acid; KIN: kinetin. Bars = 1 cm.

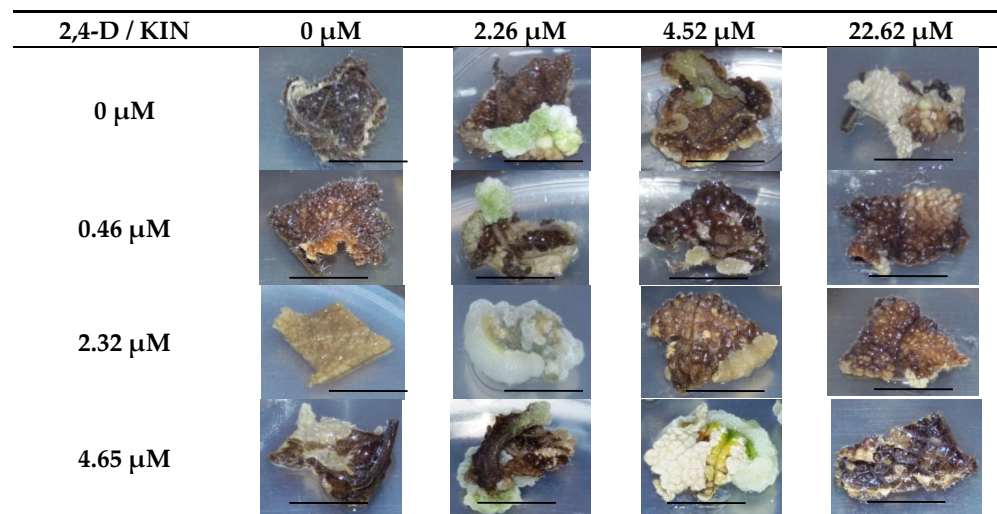

**Figure S2.** Callus of *S. tingitana* developed from leaf explants in light condition on MS supplemented with different combination of PGRs and 10 mg/L of ascorbic acid after 4 weeks. MS: Murashige and Skoog medium; PGRs: plant growth regulators; 2,4-D: 2,4-dichlorophenoxyacetic acid; KIN: kinetin. Bars = 1 cm.

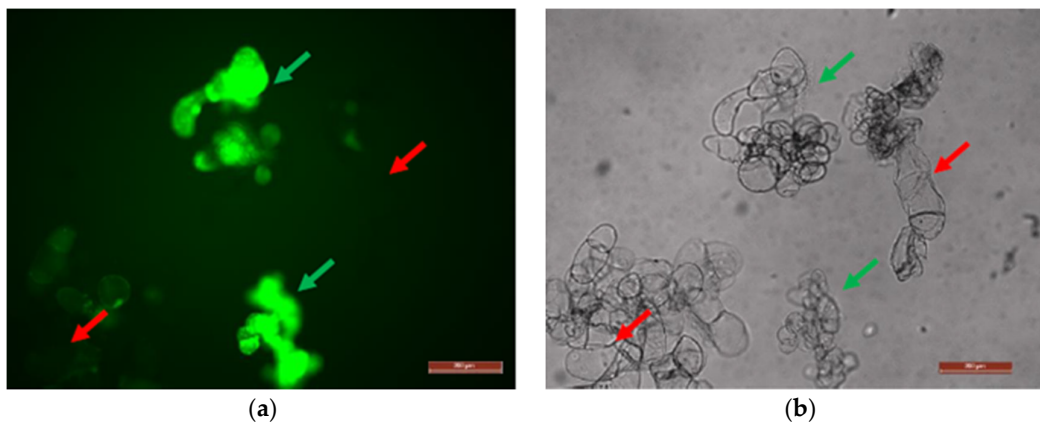

**Figure S3.** FDA staining of *S. tingitana* callus. a: fluorescent observation; b: bright field observation (40×). Green arrows mean living cell while red mean dead cells. FDA: fluoresceine diacetate. Bars = 200  $\mu$ m.

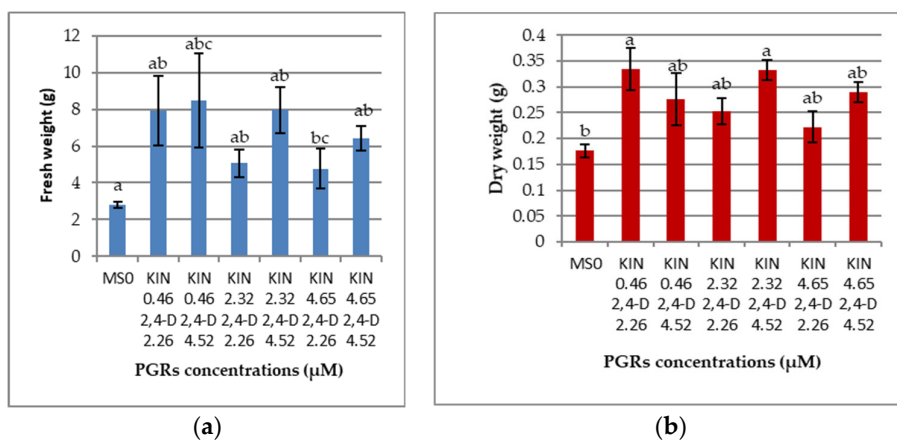

**Figure S4.** Effect of different combination of plant growth regulators to *S. tingitana* callus biomass production. a: fresh weight; b: dry weight. Data are reported as mean of six replicates  $\pm$  SE,  $n=6$ . Different letters identify values which differ at  $p \leq 0.05$ .

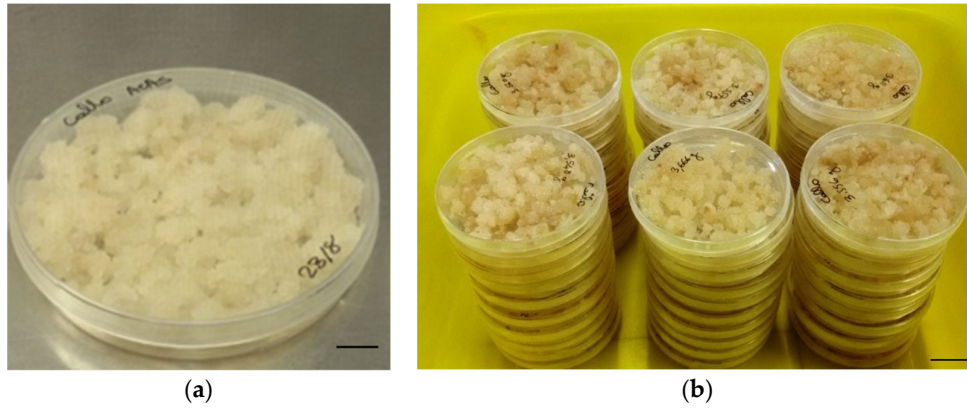

**Figure S5.** Callus of *S. tingitana*. a: friable callus obtained after several subculture in MS medium supplemented with KIN 2.32  $\mu$ M and 2,4-D 4.52  $\mu$ M and ascorbic acid 10 mg/L. MS: Murashige and Skoog medium; KIN: kinetin; 2,4-D: 2,4-dichlorophenoxyacetic acid. Bar=1 cm. b: biomass production. Bar = 2 cm.

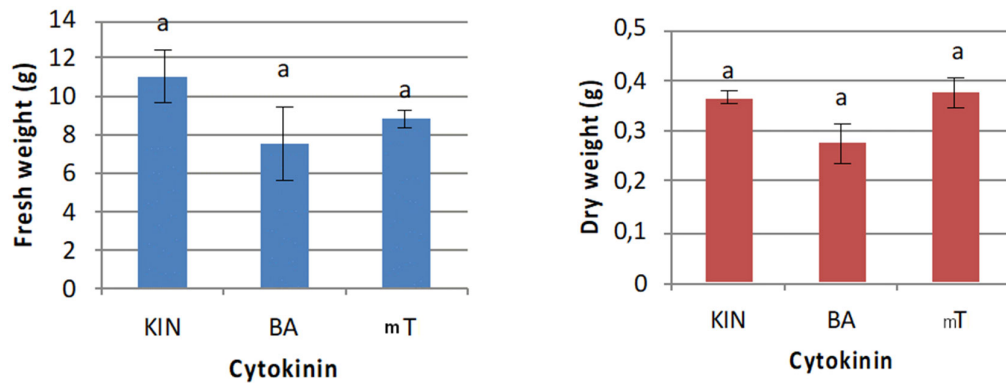

**Figure S6.** Effect of equimolar concentration of different cytokinins on callus growth. KIN: kinetin; BA: 6-benzylamino-purine; mT: meta Topolin. Values represent the mean  $\pm$  standard error (SE)  $n=4$ .

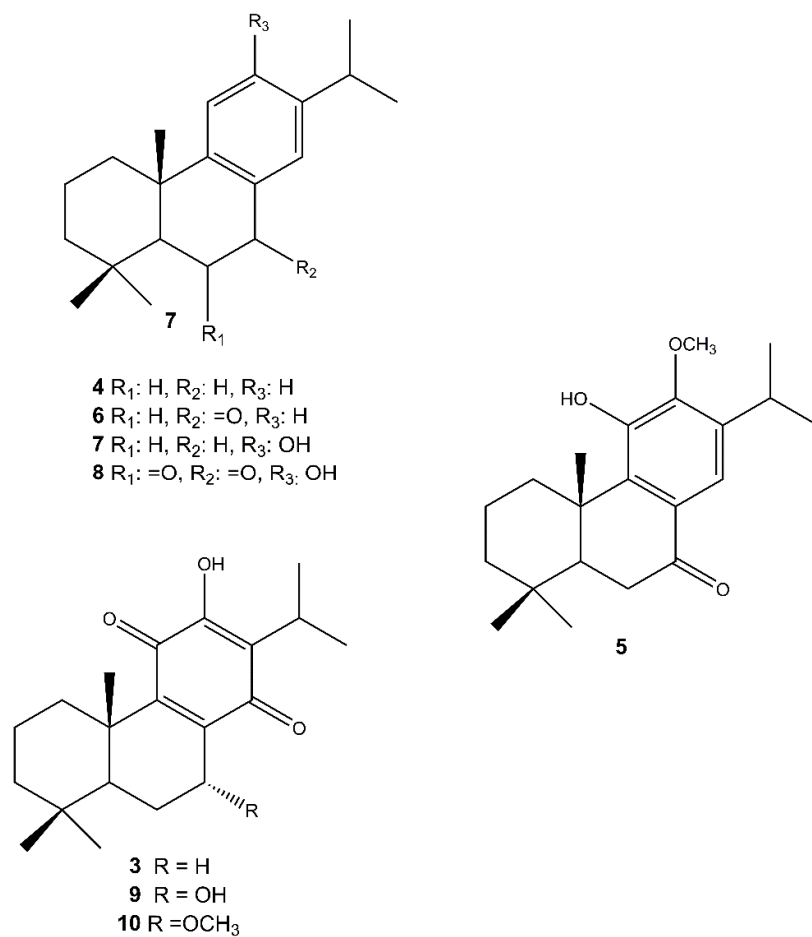

**Figure S7.** Abietane diterpenoids isolated from the roots of *S. tingitana*. **3**: royleanone; **4**: abieta-8,11,13-triene; **5**: cryptojaponol; **6**: abieta-8,11,13-trien-7-one; **7**: ferruginol; **8**: 12-hydroxyabieta-8,11,13-triene-6,7-dione (hypargenin C); **9**: horminone; **10**: 7-*O*-methylhorminone

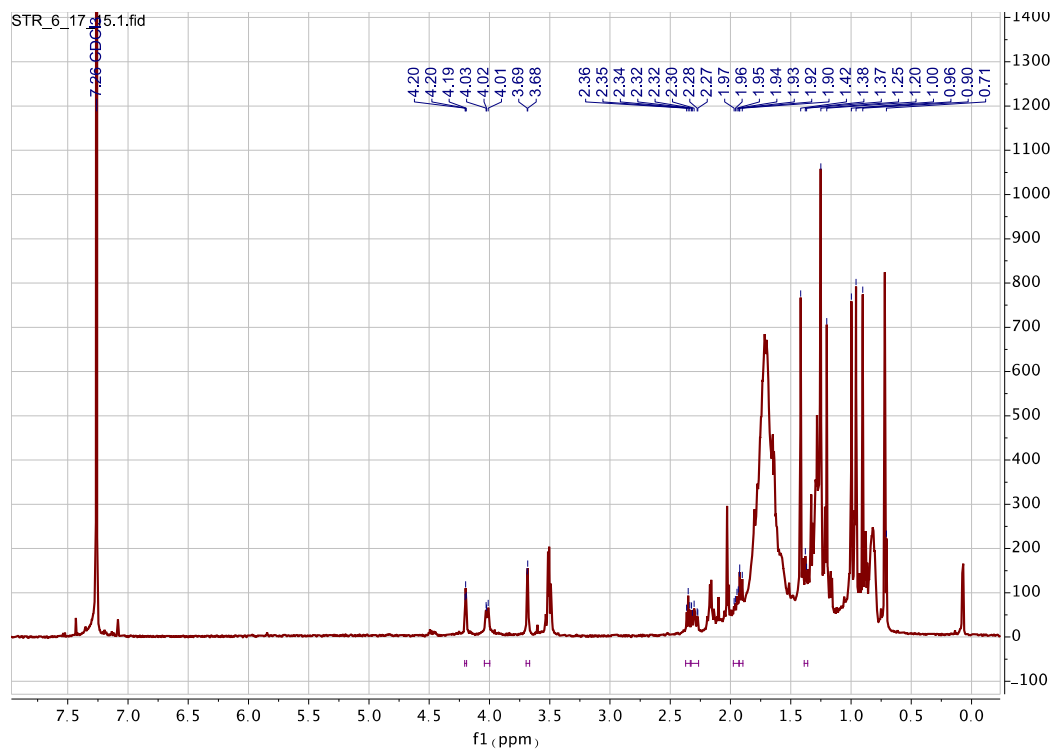

Figure S8. <sup>1</sup>H NMR (600 MHz, CDCl<sub>3</sub>) spectrum of compound 13.

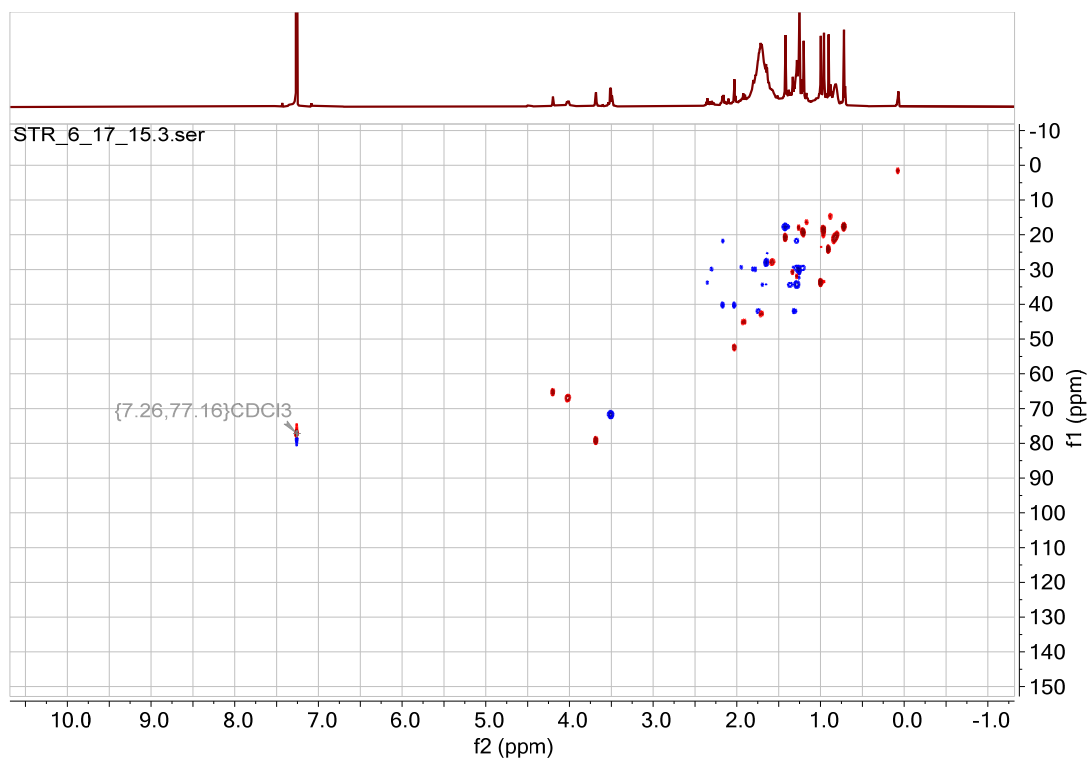

Figure S9. HSQC (600 MHz, CDCl<sub>3</sub>) spectrum of compound 13.

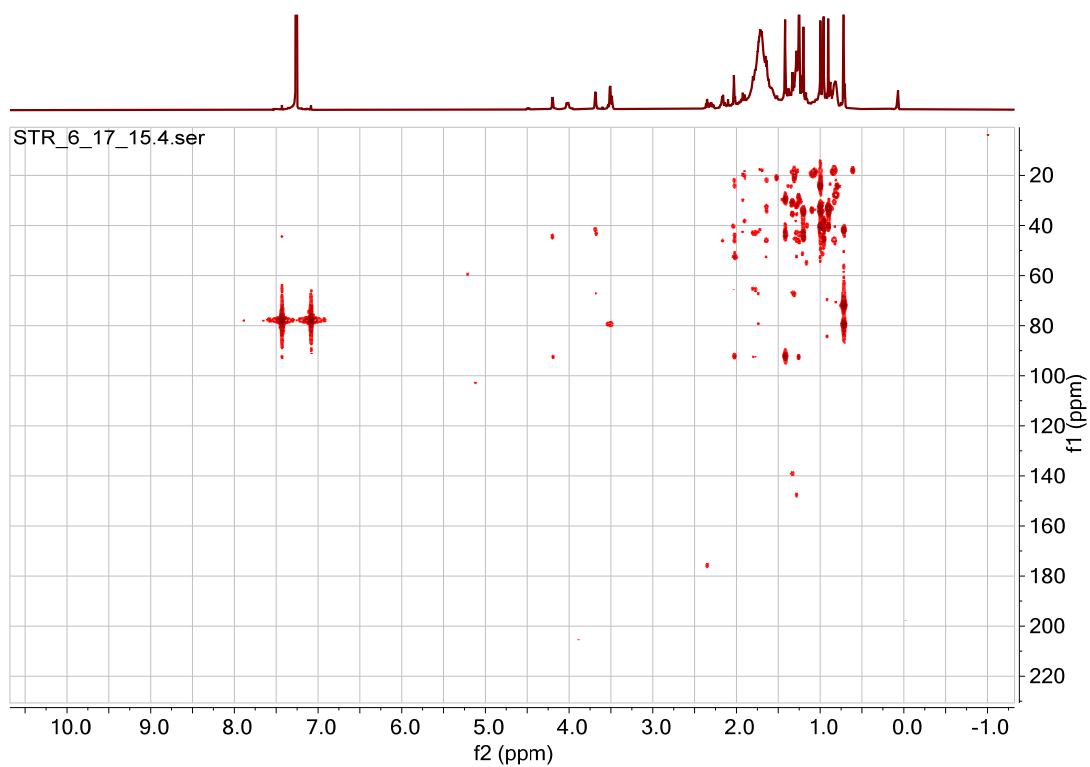

Figure S10. HMBC (600 MHz, CDCl<sub>3</sub>) spectrum of compound 13.

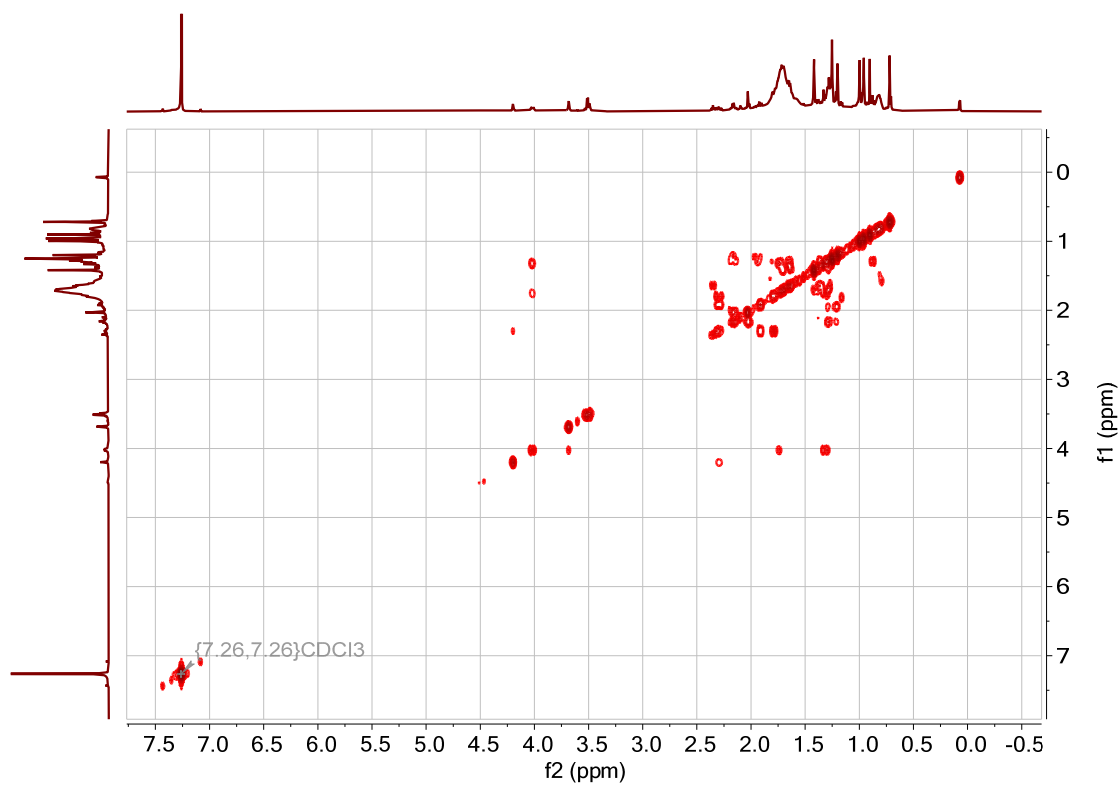

Figure S11. COSY (600 MHz, CDCl<sub>3</sub>) spectrum of compound 13.

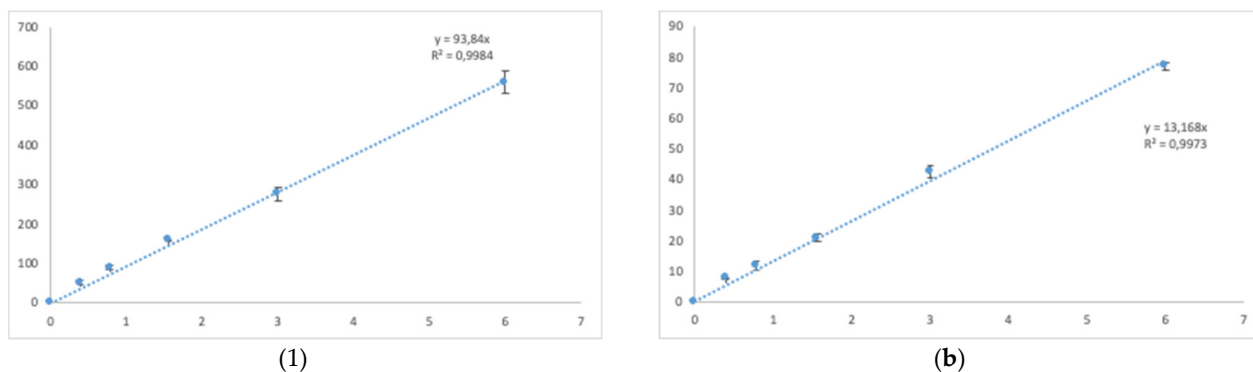

**Figure S12.** Calibration curves obtained for the LC/MS/MS analysis of sclareol (1) and manool (2) using pure compounds.

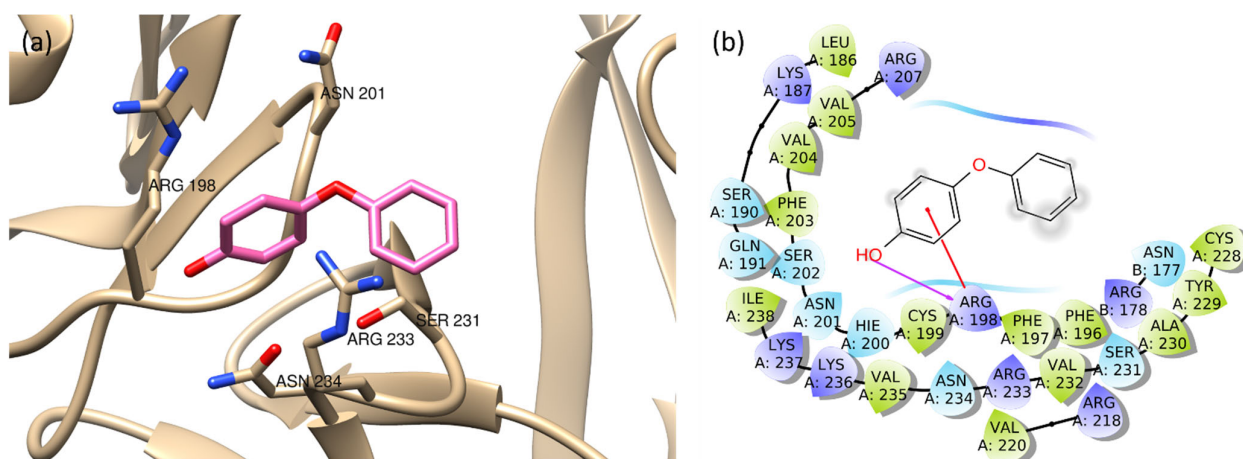

**Figure S13.** Binding pose and ligand interaction plot of 4-phenoxyphenol at the conserved AgrA active site.

(a): protein is reported as light brown ribbons, 4-phenoxyphenol is reported as capped sticks and is colored in magenta. (b): 4-phenoxyphenol is surrounded by the protein residues represented as follows: the negatively charged residues are indicated in red, polar residues are in cyan, hydrophobic residues are shown in green, H-bonds are presented as purple arrows and pi-cation as red line..



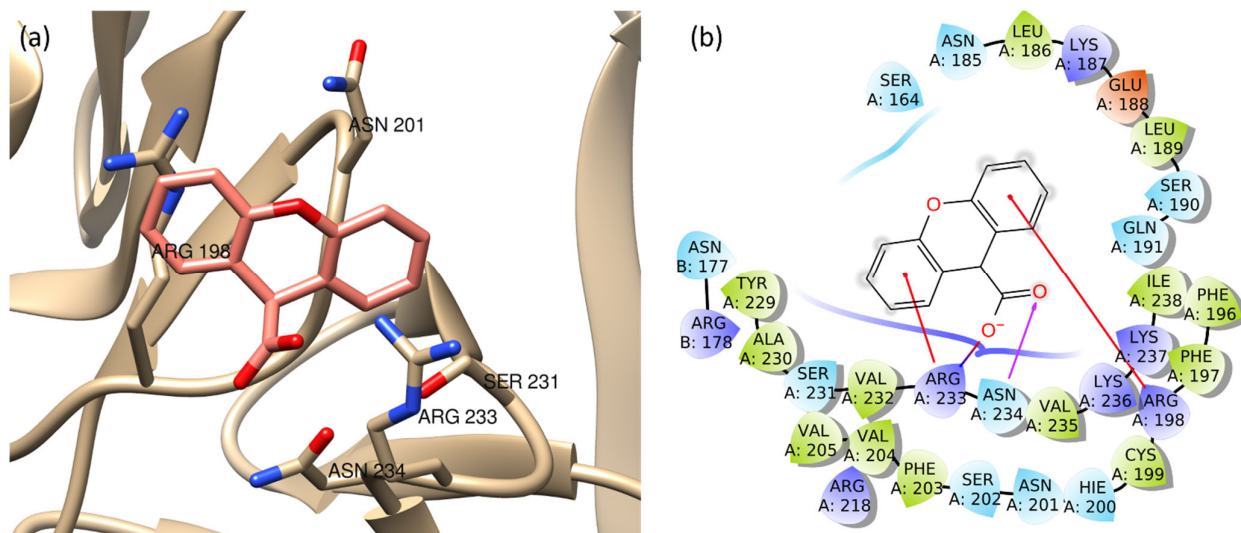

**Figure S14.** Binding pose and ligand interaction plot of 9H-xanthene-9-carboxylic acid at the conserved AgrA active site.(a): the protein is reported as light brown ribbons, 9H-xanthene-9-carboxylic acid is reported as capped sticks and is colored in salmon. (b): 9H-xanthene-9-carboxylic acid is surrounded by the residues represented as follows: the negatively charged residues are indicated in red, polar residues are in cyan, hydrophobic residues are shown in green, H-bonds are presented as purple arrows and pi-cation as red line.

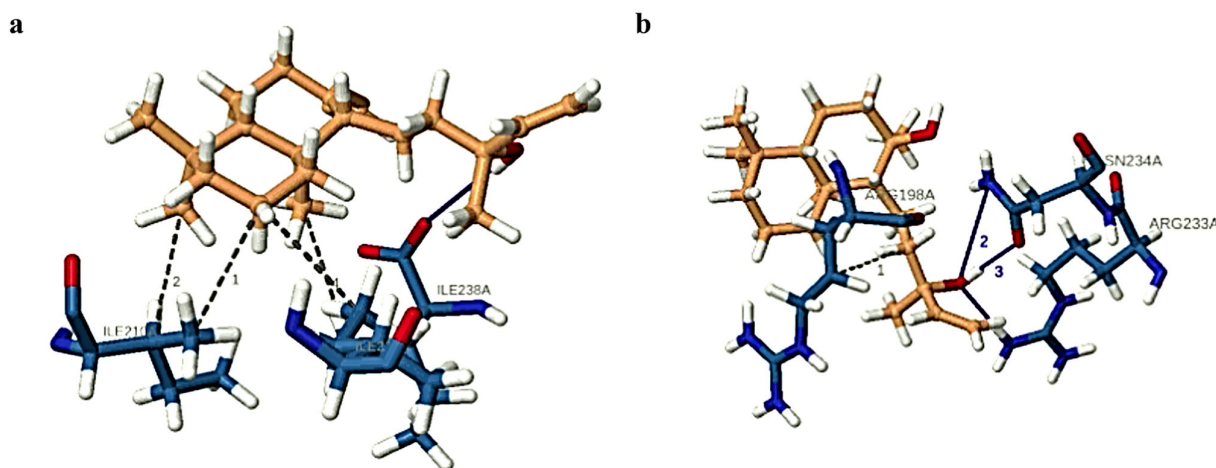

**Figure S15.** Manool and sclareol interactions with the key residues into the binding cavity.a: manool interactions; b: sclareol interactions; blue lines: H-bonds; broken grey lines: Van der Waals interactions.

**Table S1.** Literature survey about the presence of sclareol (1) and manool (2) in *Salvia* spp.<sup>a</sup>

| Accepted Name, Proto-<br>logue [1]                            | Synonyms [1]                                                                                                                                                                                                                                                                                                                                                                                                                                                                                                                                                                                                                                                                                                                                                                                                                                                                                                                                                                                    | Part/s of<br>the<br>Plant             | Sclareol<br>(1) | Manool<br>(2)                                                            | References |
|---------------------------------------------------------------|-------------------------------------------------------------------------------------------------------------------------------------------------------------------------------------------------------------------------------------------------------------------------------------------------------------------------------------------------------------------------------------------------------------------------------------------------------------------------------------------------------------------------------------------------------------------------------------------------------------------------------------------------------------------------------------------------------------------------------------------------------------------------------------------------------------------------------------------------------------------------------------------------------------------------------------------------------------------------------------------------|---------------------------------------|-----------------|--------------------------------------------------------------------------|------------|
| <i>Salvia aethi-<br/>opis</i> L., Sp.<br>Pl.: 27 (1753)       | Homotypic Names: <i>Sclarea aethiopis</i> (L.) Mill., Gard. Dict. ed. 8: n.º 2 (1768); <i>Sclarea lanata</i> Moench, Methodus: 374 (1794), nom. superfl.; <i>Salvia lanata</i> Stokes, Bot. Mat. Med.: 52 (1812), nom. illeg.                                                                                                                                                                                                                                                                                                                                                                                                                                                                                                                                                                                                                                                                                                                                                                   | flower,<br>leaf and<br>stems          | ND              | 5.7% in stems,<br>0.6% p/V in<br>flower, 2.1%<br>in leaf of ex-<br>tract | [2]        |
|                                                               | Heterotypic Synonyms: <i>Salvia kochiana</i> Kunze, Index Seminum (LZ, Lipsiensis) 1847: 4 (1847); <i>Salvia leuco-neura</i> Boiss., Diagn. Pl. Orient., ser. 2, 4: 20 (1859); <i>Aethi-<br/>opis vera</i> Fourr., Ann. Soc. Linn. Lyon, n.s., 17: 134 (1869); <i>Salvia idanensis</i> Gand., Fl. Lyon.: 171 (1875).                                                                                                                                                                                                                                                                                                                                                                                                                                                                                                                                                                                                                                                                            | aerial<br>parts                       | ND              | 0.8% of the es-<br>sential oil                                           | [3]        |
| <i>Salvia<br/>argentea</i> L.,<br>Sp. Pl. ed. 2:<br>38 (1762) | Homotypic Names: <i>Sclarea argentea</i> (L.) Mill., Gard. Dict. ed. 8: n.º 15 (1768); <i>Salvia argentea</i> var. <i>fontanesiana</i> Maire in É.Jahandiez & al., Cat. Pl. Maroc 3: 642 (1934), not validly publ. Heterotypic Synonyms: <i>Salvia patula</i> Desf., Fl. Atlant. 1: 25 (1798); <i>Salvia atlantica</i> Pers., Syn. Pl. 1: 29 (1805); <i>Salvia tmolea</i> Boiss., Diagn. Pl. Orient. 5: 9 (1844); <i>Salvia saccata</i> Pourr. ex Willk. & Lange, Prodr. Fl. Hispan. 2: 424 (1868); <i>Salvia aurasiaca</i> Pomel, Nouv. Mat. Fl. Atl.: 306 (1874); <i>Salvia suaveolens</i> Pomel, Nouv. Mat. Fl. Atl.: 306 (1874); <i>Salvia ar-<br/>gentea</i> var. <i>gussonei</i> Boiss. ex Nyman, Consp. Fl. Eur.: 569 (1881), nom. nud.; <i>Salvia ar-<br/>gentea</i> var. <i>patula</i> (Desf.) Ny-<br>man, Consp. Fl. Eur.: 569 (1881); <i>Salvia alpestris</i> Hausskn. ex Nyman, Consp. Fl. Eur., Suppl. 2, 1: 248 (1889); <i>Salvia rhodopea</i> Velen., Sitzungsber. Königl. Böhm. | leaves<br>and infi-<br>orescenc<br>es | ND              | 14.6% of the<br>essential oil                                            | [4]        |

|                                                                   |                                                                                                                                                                                                                                                                                                                                                                                                                                                                                                                                                                                                                                                                                                 |                            |                         |  |     |
|-------------------------------------------------------------------|-------------------------------------------------------------------------------------------------------------------------------------------------------------------------------------------------------------------------------------------------------------------------------------------------------------------------------------------------------------------------------------------------------------------------------------------------------------------------------------------------------------------------------------------------------------------------------------------------------------------------------------------------------------------------------------------------|----------------------------|-------------------------|--|-----|
|                                                                   | <p>Ges. Wiss., Math.-Naturwiss. Cl. 37: 388 (1892 publ. 1893); <i>Salvia argentea</i> subsp. <i>patula</i> (Desf.) Maire, Bull. Soc. Hist. Nat. Afrique N. 15: 90 (1924); <i>Salvia argentea</i> var. <i>pomelii</i> Maire, Bull. Soc. Hist. Nat. Afrique N. 15: 90 (1924); <i>Salvia argentea</i> var. <i>aurasiaca</i> (Pomel) Maire, Mém. Soc. Sci. Nat. Maroc 21-22: 13 (1930); <i>Salvia argentea</i> var. <i>mesatlantica</i> Maire, Mém. Soc. Sci. Nat. Maroc 21-22: 13 (1930).</p>                                                                                                                                                                                                      |                            |                         |  |     |
|                                                                   | <p>Heterotypic Synonyms: <i>Salvia bachtiarica</i> Bunge, Labiat. Persic.: 47 (1873); <i>Salvia hypochionea</i> Buhse ex Boiss., Fl. Orient. 4: 620 (1879); <i>Salvia montbretii</i> var. <i>virescens</i> Freyn, Bull. Herb. Boissier, sér. 2, 1: 278 (1901); <i>Salvia kopetdaghensis</i> Kudr., Trudy Sektora Rast. Res. Komit. Nauk Uzbeksk. SSR 3: 26 (1937); <i>Salvia linczevskii</i> Kudr., Trudy Sektora Rast. Res. Komit. Nauk Uzbeksk. SSR 3: 22 (1937); <i>Salvia kourossia</i> Parsa, Kew Bull. 3: 224 (1948); <i>Salvia lurorum</i> Rech.f., Oesterr. Bot. Z. 99: 57 (1952); <i>Salvia linguifolia</i> Hedge &amp; Hub.-Mor., Notes Roy. Bot. Gard. Edinburgh 22: 181 (1957).</p> | 13.3% of the essential oil | 1% of the essential oil |  | [5] |
| <p><i>Salvia atropatana</i> Bunge, Labiat. Persic.: 47 (1873)</p> | <p>aerial parts</p>                                                                                                                                                                                                                                                                                                                                                                                                                                                                                                                                                                                                                                                                             | 0.3% of the essential oil  | ND                      |  | [6] |
| <p><i>Salvia candidissima</i> subsp. <i>candidissima</i></p>      | <p>roots</p>                                                                                                                                                                                                                                                                                                                                                                                                                                                                                                                                                                                                                                                                                    | NQ                         | NQ                      |  | [7] |
|                                                                   | <p>Heterotypic Synonyms: <i>Salvia albida</i> Jacq., Observ. Bot. 1: 10 (1764), name not found; <i>Salvia crassifolia</i> Sm. in J. Sibthorp &amp; J.E. Smith, Fl. Graec. Prodr. 1: 17 (1806), nom. illeg.; <i>Salvia albida</i> Spreng., Index Seminum (HAL, Halensis) 1807: 53 (1807), nom. illeg.; <i>Salvia odorata</i> Willd., Enum. Pl.: 43 (1809); <i>Salvia argentea</i> Benth., Labiat. Gen. Spec.: 223 (1833), nom. illeg.; <i>Salvia armena</i> K.Koch, Linnaea 21: 654</p>                                                                                                                                                                                                          |                            |                         |  |     |

|                                                                                                                                                  |                                                                                                                                                                                                                                                                                                                                                                                                                                                                                                                                  |                                             |                                |                                      |  |                      |
|--------------------------------------------------------------------------------------------------------------------------------------------------|----------------------------------------------------------------------------------------------------------------------------------------------------------------------------------------------------------------------------------------------------------------------------------------------------------------------------------------------------------------------------------------------------------------------------------------------------------------------------------------------------------------------------------|---------------------------------------------|--------------------------------|--------------------------------------|--|----------------------|
|                                                                                                                                                  | (1849); <i>Salvia pycnophylla</i><br>Greuter & Burdet, Will-<br>denowia 14: 301 (1984 publ.<br>1985).                                                                                                                                                                                                                                                                                                                                                                                                                            |                                             |                                |                                      |  |                      |
| <i>Salvia<br/>candidissima</i><br><b>Vahl</b> , Enum.<br>Pl. Obs. 1:<br>278 (1804)                                                               | Homotypic Names: <i>Sclarea<br/>candidissima</i> (Vahl) Soják,<br>Cas. Nár. Mus., Odd. Prír.<br>152: 21 (1983).                                                                                                                                                                                                                                                                                                                                                                                                                  | aerial<br>parts                             | 2.5% of the es-<br>sential oil | 1.8% of the es-<br>sential oil       |  | [8]                  |
| <i>Salvia cassia</i><br><b>Sam. ex<br/>Rech.f.</b> , Ark.<br>Bot., a.s., 1:<br>320 (1950)                                                        | -                                                                                                                                                                                                                                                                                                                                                                                                                                                                                                                                | aerial<br>parts                             | ND                             | 2.1% of the es-<br>sential oil       |  | [9]                  |
| <i>Salvia chrys-<br/>ophylla</i><br><b>Stapf</b> ,<br>Denkschr.<br>Kaiserl.<br>Akad. Wiss.,<br>Wien.<br>Math.Naturw<br>iss. Kl. 50: 96<br>(1885) |                                                                                                                                                                                                                                                                                                                                                                                                                                                                                                                                  |                                             | 1.12% of the<br>essential oil  | 1.37% of the<br>essential oil        |  | [10]                 |
| <i>Salvia<br/>desoleana</i><br><b>Atzei &amp;<br/>V.Picci</b> ,<br>Webbia 36:<br>72 (1982)                                                       | Heterotypic Synonyms: <i>Sal-<br/>via bourgeana</i> Barbey, Bull.<br>Soc. Vaud. Sci. Nat. 21: 96<br>(1885).                                                                                                                                                                                                                                                                                                                                                                                                                      | aerial<br>parts                             | NQ                             | ND                                   |  | [11]                 |
| <i>Salvia<br/>dominica</i> L.,<br>Sp. Pl.: 25<br>(1753)                                                                                          | Heterotypic Synonyms: <i>Sal-<br/>via graveolens</i> Vahl, Enum. Pl.<br>Obs. 1: 273 (1804). <i>Salvia com-<br/>mutata</i> Benth., Labiat. Gen.<br>Spec.: 222 (1833). <i>Salvia syri-<br/>aca</i> Gouan ex Benth. in<br>A.P.de Candolle, Prodr. 12:<br>279 (1848).                                                                                                                                                                                                                                                                | whole<br>plant                              | NQ                             | ND                                   |  | [13]                 |
| <i>Salvia<br/>fruticosa</i><br><b>Mill.</b> , Gard.<br>Dict. ed. 8: n.º<br>5 (1768)                                                              | Heterotypic Synonyms:<br><i>Salvia baccifera</i> Etl., Salv.: 18<br>(1777); <i>Salvia incarnata</i> Etl.,<br>Salv.: 25 (1777); <i>Salvia triloba</i><br>L.f., Suppl. Pl.: 88 (1782); <i>Sal-<br/>via sipylea</i> Lam., Tabl. Encycl.<br>1: 68 (1791); <i>Salvia sypileia</i><br>Lam., Tabl. Encycl. 1: 68<br>(1791); <i>Salvia clusii</i> Jacq., Pl.<br>Hort. Schoenbr. 2: 37 (1797);<br><i>Salvia marrubioides</i> Vahl,<br>Enum. Pl. Obs. 1: 223 (1804);<br><i>Salvia ovata</i> F.Dietr., Nachtr.<br>Vollst. Lex. Gärt. 7: 465 | whole<br>plant<br>aerial<br>parts<br>leaves | ND<br>ND                       | NQ<br>0.2-4% of the<br>essential oil |  | [14]<br>[15]<br>[16] |

|                                                                          |                                                                                                                                                                                                                                                                                                                                                                                                                                                                                                                                                                                                                                                                                                                                                                                                                                                                                                                                                                                                                                                                                                                                                                                                                                                                                                                                                                                                                                                                                                       |                 |                               |                                |      |
|--------------------------------------------------------------------------|-------------------------------------------------------------------------------------------------------------------------------------------------------------------------------------------------------------------------------------------------------------------------------------------------------------------------------------------------------------------------------------------------------------------------------------------------------------------------------------------------------------------------------------------------------------------------------------------------------------------------------------------------------------------------------------------------------------------------------------------------------------------------------------------------------------------------------------------------------------------------------------------------------------------------------------------------------------------------------------------------------------------------------------------------------------------------------------------------------------------------------------------------------------------------------------------------------------------------------------------------------------------------------------------------------------------------------------------------------------------------------------------------------------------------------------------------------------------------------------------------------|-----------------|-------------------------------|--------------------------------|------|
|                                                                          | (1821); <i>Salvia subtriloba</i><br>Schränk, Syll. Pl. Nov. 2: 58<br>(1826); <i>Sclarea triloba</i> (L.f.)<br>Raf., Fl. Tellur. 3: 94 (1837);<br><i>Salvia libanotica</i> Boiss. &<br>Gaill. in P.E.Boissier, Diagn.<br>Pl. Orient., ser. 2, 4: 16 (1859);<br><i>Salvia cypria</i> Unger &<br>Kotschy, Ins. Cypren: 266<br>(1865); <i>Salvia triloba</i> var.<br><i>calpeana</i> Dautez & Debeaux<br>in J.O.Debeaux, Syn. Fl.<br>Gibraltar: 161 (1889); <i>Salvia</i><br><i>lobryana</i> Azn., Magyar Bot.<br>Lapok 1: 195 (1902); <i>Salvia</i><br><i>triloba</i> var. <i>subhastata</i><br>H.Lindb., Öfvers. Finska<br>Vetensk.-Soc. Förh. 48(13): 94<br>(1906); <i>Salvia fruticosa</i> subsp.<br><i>cypria</i> (Unger & Kotschy)<br>Holmboe, Stud. Veg.<br>Cyprus: 158 (1914); <i>Salvia</i><br><i>triloba</i> subsp. <i>cypria</i><br>(Kotschy) Holmboe, Stud.<br>Veg. Cyprus: 158 (1914);<br><i>Salvia triloba</i> subsp. <i>libanotica</i><br>(Boiss. & Gaill.) Holmboe,<br>Stud. Veg. Cyprus: 158<br>(1914); <i>Salvia thomasi</i><br>Lacaita, Nuovo Giorn. Bot.<br>Ital., n.s., 29: 186 (1922 publ.<br>1923); <i>Salvia triloba</i> subsp.<br><i>calpeana</i> (Dautez & Debeaux)<br>P.Silva, Agron. Lusit. 20: 237<br>(1958); <i>Salvia fruticosa</i> subsp.<br><i>thomasi</i> (Lacaita) Brullo,<br>Guglielmo, Pavone &<br>Terrasi, Inform. Bot. Ital. 26:<br>211 (1994 publ. 1995).<br>Homotypic Names: <i>Sclarea</i><br><i>glutinosa</i> (L.) Mill., Gard.<br>Dict. ed. 8: n.º 11 (1768). |                 |                               |                                |      |
| <b><i>Salvia</i><br/><i>glutinosa</i> L.,<br/>Sp. Pl.: 26<br/>(1753)</b> | <i>Glutinaria glutinosa</i> (L.) Raf.,<br>Fl. Tellur. 3: 93 (1837).<br><i>Drymosphace glutinosa</i> (L.)<br>Opiz, Seznam: 38 (1852).<br>Heterotypic Synonyms:<br><i>Glutinaria acuminata</i> Raf.,<br>Autik. Bot.: 122 (1840).                                                                                                                                                                                                                                                                                                                                                                                                                                                                                                                                                                                                                                                                                                                                                                                                                                                                                                                                                                                                                                                                                                                                                                                                                                                                        | aerial<br>parts | 11.9% of the<br>essential oil | 6.8% of the es-<br>sential oil | [8]  |
| <b><i>Salvia</i><br/><i>hypoleuca</i><br/>Benth.,</b>                    | -                                                                                                                                                                                                                                                                                                                                                                                                                                                                                                                                                                                                                                                                                                                                                                                                                                                                                                                                                                                                                                                                                                                                                                                                                                                                                                                                                                                                                                                                                                     | roots           | ND                            | NQ                             | [17] |

|                                                                                                               |                                                                                                                                                                                                                                                                                                                                                                                                                                                                                                                                                                                                           |              |                             |                          |  |      |
|---------------------------------------------------------------------------------------------------------------|-----------------------------------------------------------------------------------------------------------------------------------------------------------------------------------------------------------------------------------------------------------------------------------------------------------------------------------------------------------------------------------------------------------------------------------------------------------------------------------------------------------------------------------------------------------------------------------------------------------|--------------|-----------------------------|--------------------------|--|------|
| A.P.de Candolle, Prodr. 12: 279 (1848)                                                                        |                                                                                                                                                                                                                                                                                                                                                                                                                                                                                                                                                                                                           |              |                             |                          |  |      |
| <b>Salvia judaica Boiss.</b> , Diagn. Pl. Orient. 12: 61 (1853)                                               | -                                                                                                                                                                                                                                                                                                                                                                                                                                                                                                                                                                                                         | leaf         | 7.01% of the essential oil  | ND                       |  | [18] |
| <b>Salvia lanigera Poir.</b> (Poir.) Batt. in J.A.Battandier J.B.A.M.de Lamarck, Encycl., Suppl. 5: 49 (1817) | Homotypic Names: <i>Salvia verbenaca</i> subsp. <i>lanigera</i> (Poir.) Batt. in J.A.Battandier & L.C.Trabut, Fl. Algérie, Di- cot.: 688 (1890). Heterotypic Synonyms: <i>Salvia rugosissima</i> Zucc., Abh. Math.-Phys. Cl. Königl. Bayer. Akad. Wiss. 3: 244 (1843).                                                                                                                                                                                                                                                                                                                                    | leaves       | 14.44% of eth- anol extract | ND                       |  | [19] |
| <b>Salvia limbata C.A.Mey.</b> , Verz. Pfl. Casp. Meer.: 86 (1831)                                            | Heterotypic Synonyms: <i>Salvia flexuosa</i> Schrank, Syll. Pl. Nov. 2: 57 (1826), provision- ally listed as a synonym; <i>Salvia polyadenia</i> Boiss. & Heldr. in P.E.Boissier, Diagn. Pl. Orient. 5: 7 (1844); <i>Salvia chrysadenia</i> Freyn, Bull. Herb. Boissier, sér. 2, 1: 279 (1901)                                                                                                                                                                                                                                                                                                            | aerial parts | NQ                          | NQ                       |  | [20] |
| <b>Salvia majdae (Rech.f. &amp; Wen- delbo) Sytsma</b> , Taxon 66: 142 (2017)                                 | Homotypic Names: <i>Zhumeria majdae</i> Rech.f. & Wendelbo, Nytt Mag. Bot. 14: 39 (1967).                                                                                                                                                                                                                                                                                                                                                                                                                                                                                                                 | roots        | ND                          | NQ                       |  | [21] |
|                                                                                                               |                                                                                                                                                                                                                                                                                                                                                                                                                                                                                                                                                                                                           |              | ND                          | NQ                       |  | [22] |
|                                                                                                               |                                                                                                                                                                                                                                                                                                                                                                                                                                                                                                                                                                                                           | aerial parts | ND                          | 37.1% of es- sential oil |  | [23] |
|                                                                                                               | Heterotypic Synonyms: <i>Salvia kotschyi</i> Boiss., Diagn. Pl. Orient. 7: 46 (1846); <i>Salvia macrosiphon</i> var. <i>cabulica</i> Benth. in A.P.de Candolle, Prodr. 12: 282 (1848); <i>Salvia macrosiphon</i> var. <i>kotschyi</i> (Boiss.) Boiss., Fl. Orient. 4: 615 (1879); <i>Salvia macrosiphonia</i> St.-Lag., Ann. Soc. Bot. Lyon 7: 134 (1880); <i>Salvia cuspidatissima</i> Pau, Trab. Mus. Ci. Nat., Ser. Bot. 14: 33 (1918); <i>Salvia albifrons</i> Nábelek, Spisy Prír. Fak. Ma- sarykovy Univ. 70: 49 (1926); <i>Salvia macrosiphon</i> var. <i>brach- ycalycina</i> Bornm., Bot. Jahrb. |              | 15.76 % of es- sential oil  | 2.10% of es- sential oil |  | [24] |
| <b>Salvia macrosiphon Boiss.</b> , Di- agn. Pl. Ori- ent. 5: 11 (1844)                                        |                                                                                                                                                                                                                                                                                                                                                                                                                                                                                                                                                                                                           | aerial parts | 8.6% % of es- sential oil   | ND                       |  | [6]  |

|                                          |                                                                                                                                                                                                                                                                 |   |                       |                                                                                                                                                                                      |                                         |
|------------------------------------------|-----------------------------------------------------------------------------------------------------------------------------------------------------------------------------------------------------------------------------------------------------------------|---|-----------------------|--------------------------------------------------------------------------------------------------------------------------------------------------------------------------------------|-----------------------------------------|
|                                          | Syst. 62: 238 (1934); <i>Salvia macrosiphon</i> var. <i>glandulosissima</i> Bornm., Bot. Jahrb. Syst. 62: 238 (1934); <i>Salvia nachiczewanica</i> Pobed. in V.L.Komarov, Fl. URSS 21: 657 (1954)                                                               |   |                       |                                                                                                                                                                                      |                                         |
| <b><i>Salvia montbretii</i> Benth.,</b>  | Ann. Sci. Nat., Bot., sér. 2, 6: 42 (1836)                                                                                                                                                                                                                      | - | aerial parts          | ND                                                                                                                                                                                   | 0.3 % of essential oil [25]             |
|                                          | Homotypic Names:<br><i>Arischrada multicaulis</i> (Vahl) Pobed., Novosti Sist. Vyssh. Rast. 9: 247 (1972); <i>Stiefia multicaulis</i> (Vahl) Soják, Cas. Nár. Mus., Odd. Prír. 152: 22 (1983).                                                                  |   |                       |                                                                                                                                                                                      |                                         |
| <b><i>Salvia multicaulis</i> Vahl,</b>   | Heterotypic Synonyms: <i>Salvia pinardii</i> Boiss., Diagn. Pl. Enum. Pl. Orient. 12: 59 (1853); <i>Salvia rascheyana</i> Boiss., Diagn. Pl. Obs. 1: 225 (1804)                                                                                                 |   | roots                 | ND                                                                                                                                                                                   | NQ [26]                                 |
|                                          | <i>rascheyana</i> Boiss., Diagn. Pl. Orient. 12: 58 (1853); <i>Salvia bodeana</i> Bunge, Labiat. Persic.: 42 (1873); <i>Salvia szovitsiana</i> Bunge, Labiat. Persic.: 43 (1873); <i>Schraderia acetabulosa</i> Pobed. in V.L.Komarov, Fl. URSS 21: 369 (1954). |   | stems and leaves      | ND                                                                                                                                                                                   | NQ [27]                                 |
|                                          |                                                                                                                                                                                                                                                                 |   |                       | 5.18% of essential oil <i>S. officinalis</i> , 2.86% <i>S. o.</i> cv. 'Purpurascens', 3.08% <i>S. o.</i> cv. 'Tricolor', 2.16% <i>S. o.</i> cv. 'Kew Gold', 7.01 % <i>S. judaica</i> |                                         |
| <b><i>Salvia officinalis</i> L., Sp.</b> | Heterotypic Synonyms: <i>Salvia officinalis</i> subsp. minor (C.C.Gmel.) Gams in G.Hegi, Pl.: 23 (1753) Ill. Fl. Mitt.-Eur. 5: 2483 (1927).                                                                                                                     |   | leaf                  | ND                                                                                                                                                                                   | [18]                                    |
|                                          |                                                                                                                                                                                                                                                                 |   | aerial parts          | NQ                                                                                                                                                                                   | [28]                                    |
|                                          |                                                                                                                                                                                                                                                                 |   | leaves                | ND                                                                                                                                                                                   | [29]                                    |
|                                          |                                                                                                                                                                                                                                                                 |   | flower, leaf and stem | ND                                                                                                                                                                                   | 9.0% (leaf), 11.1 % (flower), 9.9% [30] |

|                                                                                                                                                                                                                                                                                                                                                                                                                                                                                                                                                                                                                                                                                                                                        |  |  | (stem) of ethanol extract |                |              |      |
|----------------------------------------------------------------------------------------------------------------------------------------------------------------------------------------------------------------------------------------------------------------------------------------------------------------------------------------------------------------------------------------------------------------------------------------------------------------------------------------------------------------------------------------------------------------------------------------------------------------------------------------------------------------------------------------------------------------------------------------|--|--|---------------------------|----------------|--------------|------|
| Heterotypic Synonyms:<br><i>Salvia sinaica</i> Delile ex Benth.,<br><i>Salvia</i> Labiat. Gen. Spec.: 718<br><i>oligophylla</i> (1835); <i>Salvia lorentii</i> Hochst.<br><b>Aucher ex</b> in J.A.Lorent, Wanderungen:<br><b>Benth.</b> , 333 (1845); <i>Salvia sieberi</i> aerial<br>A.P.de C.Presl, Abh. Königl. Böhm. parts<br>Candolle, Ges. Wiss., ser. 5, 3: 530 ND 3.99% of essential oil<br>Prodr. 12: (1845); <i>Salvia rassamii</i> Boiss., [6]<br>279 (1848) Fl. Orient. 4: 615 (1879);<br><i>Salvia alliaria</i> Parsa, Kew<br>Bull. 3: 224 (1948).                                                                                                                                                                        |  |  |                           |                |              |      |
| Heterotypic Synonyms:<br><i>Salvia sinaica</i> Delile ex Benth.,<br><i>Salvia</i> Labiat. Gen. Spec.: 718<br><i>palaestina</i> (1835); <i>Salvia lorentii</i> Hochst.<br>in J.A.Lorent, Wanderungen:<br><b>Benth.</b> , 333 (1845); <i>Salvia sieberi</i> leaves<br>Labiat. Gen.C.Presl, Abh. Königl. Böhm. NQ ND [31]<br>Spec.: 718 Ges. Wiss., ser. 5, 3: 530<br>(1835) (1845); <i>Salvia rassamii</i> Boiss.,<br>Fl. Orient. 4: 615 (1879);<br><i>Salvia alliaria</i> Parsa, Kew<br>Bull. 3: 224 (1948).                                                                                                                                                                                                                            |  |  |                           |                |              |      |
| Heterotypic Synonyms:<br><i>Salvia grandiflora</i> Née ex<br>Cav., Icon. 5: 33 (1799), nom.<br>illeg. <i>Salvia spectabilis</i> Kunth<br>in F.W.H.von Humboldt,<br>A.J.A.Bonpland &<br>C.S.Kunth, Nov. Gen. Sp. 2:<br>304 (1818). <i>Salvia macrantha</i><br><i>Salvia patens</i> Schltdl., Allg. Gartenzeitung<br>Cav., Icon. 5: 6: 314 (1838). <i>Salvia decipiens</i> whole<br>33 (1799) M.Martens & Galeotti, Bull. plant<br>Acad. Roy. Sci. Bruxelles 4.85% of essential oil<br>11(2): 64 (1844). <i>Salvia</i> ND [32]<br><i>staminea</i> M.Martens &<br>Galeotti, Bull. Acad. Roy. Sci.<br>Bruxelles 11(2): 65 (1844),<br>nom. illeg. <i>Salvia mendax</i><br>Epling, Repert. Spec. Nov.<br>Regni Veg. Beih. 110: 96<br>(1938). |  |  |                           |                |              |      |
| <i>Salvia</i><br><i>persepolitan</i><br><i>a</i> Boiss.,<br>Diagn. Pl. -<br>Orient. 12: 60<br>(1853)                                                                                                                                                                                                                                                                                                                                                                                                                                                                                                                                                                                                                                   |  |  |                           |                |              |      |
|                                                                                                                                                                                                                                                                                                                                                                                                                                                                                                                                                                                                                                                                                                                                        |  |  | aerial                    | 0.5% of essen- | 37.3% of es- | [33] |
|                                                                                                                                                                                                                                                                                                                                                                                                                                                                                                                                                                                                                                                                                                                                        |  |  | parts                     | tial oil       | sential oil  |      |



|                                                                                                                                                    |                                                                                                                                                                                                                                                                                                                                                                                                                                                                                                                                                                                           |                 |                                                            |                          |      |
|----------------------------------------------------------------------------------------------------------------------------------------------------|-------------------------------------------------------------------------------------------------------------------------------------------------------------------------------------------------------------------------------------------------------------------------------------------------------------------------------------------------------------------------------------------------------------------------------------------------------------------------------------------------------------------------------------------------------------------------------------------|-----------------|------------------------------------------------------------|--------------------------|------|
| <i>Salvia</i><br><i>poculata</i><br><b>Nábelek,</b><br>Spisy Prír.<br>Fak. Masa-<br>rykovy Univ.<br>70: 50 (1926)                                  | Heterotypic Synonyms:<br><i>Salvia brevidens</i> Hedge &<br>Hub.-Mor., Notes Roy. Bot.<br>Gard. Edinburgh 22: 183<br>(1957).                                                                                                                                                                                                                                                                                                                                                                                                                                                              | aerial<br>parts | NQ                                                         | ND                       | [34] |
| <i>Salvia</i><br><i>reuteriana</i><br><b>Boiss.,</b><br>Diagn. Pl.<br>Orient. 5: 10<br>(1844)                                                      | -                                                                                                                                                                                                                                                                                                                                                                                                                                                                                                                                                                                         | aerial<br>parts | 0.77 - 7.88% of<br>essential oil<br>2% of essential<br>oil | ND                       | [35] |
|                                                                                                                                                    |                                                                                                                                                                                                                                                                                                                                                                                                                                                                                                                                                                                           |                 | NQ                                                         | ND                       | [36] |
|                                                                                                                                                    |                                                                                                                                                                                                                                                                                                                                                                                                                                                                                                                                                                                           |                 |                                                            | ND                       | [37] |
| <i>Salvia</i><br><i>runcinata</i><br><b>L.f.,</b> Suppl.<br>Pl.: 89 (1782)                                                                         | Heterotypic Synonyms:<br><i>Salvia monticola</i> Benth. in<br>E.H.F.Meyer, Comm. Pl. Afr.<br>Austr.: 238 (1838). <i>Salvia</i><br><i>runcinata</i> var. <i>major</i> Benth. in<br>A.P.de Candolle, Prodr. 12:<br>352 (1848). <i>Salvia runcinata</i><br>var. <i>grandiflora</i> Skan in<br>W.H.Harvey & auct. suc.<br>(eds.), Fl. Cap. 5(1): 327<br>(1910). <i>Salvia runcinata</i> var.<br><i>nana</i> Skan in W.H.Harvey &<br>auct. suc. (eds.), Fl. Cap. 5(1):<br>327 (1910). <i>Salvia sisymbriifolia</i><br>Skan in W.H.Harvey & auct.<br>suc. (eds.), Fl. Cap. 5(1): 328<br>(1910). | aerial<br>parts | ND                                                         | 6.4% of<br>essential oil | [38] |
| <i>Salvia</i><br><i>sahendica</i><br><b>Boiss. &amp;</b><br><b>Buhse,</b><br>Nouv. Mém.<br>Soc. Imp. Na-<br>turalistes<br>Moscou 12:<br>172 (1860) | -                                                                                                                                                                                                                                                                                                                                                                                                                                                                                                                                                                                         |                 | NQ                                                         | ND                       | [39] |
| <i>Salvia</i><br><i>santolinifolia</i><br><b>a Boiss.,</b><br>Diagn. Pl.<br>Orient. 5: 13<br>(1844)                                                | -                                                                                                                                                                                                                                                                                                                                                                                                                                                                                                                                                                                         | aerial<br>parts | NQ                                                         | ND                       | [40] |
|                                                                                                                                                    | Homotypic Names: <i>Pleudia</i><br><i>santolinifolia</i> (Boiss.) M.Will,<br>N.Schmalz & Class.-Bockh.,<br>Turkish J. Bot. 39: 703 (2015).                                                                                                                                                                                                                                                                                                                                                                                                                                                | aerial<br>parts | 2.75% of es-<br>sential oil                                | ND                       | [41] |
| <i>Salvia</i><br><i>sclarea</i> <b>L.,</b><br>Sp. Pl.: 27<br>(1753)                                                                                | Homotypic Names: <i>Sclarea</i><br><i>vulgaris</i> Mill., Gard. Dict.<br>ed.8: n°1 (1768); <i>Aethiopis</i><br><i>sclarea</i> (L.) Opiz, Seznam: 11<br>(1852). Heterotypic Names:<br><i>Salvia haematodes</i> Scop., Fl.<br>Carniol., ed.2, 1: 29 (1771),                                                                                                                                                                                                                                                                                                                                 | whole<br>plant  | NQ                                                         | NQ                       | [42] |
|                                                                                                                                                    |                                                                                                                                                                                                                                                                                                                                                                                                                                                                                                                                                                                           |                 | ND                                                         | NQ                       | [43] |
|                                                                                                                                                    |                                                                                                                                                                                                                                                                                                                                                                                                                                                                                                                                                                                           | aerial<br>parts | 5.3% of<br>essential oil                                   | ND                       | [6]  |

|                                                                                                         |                                                                                                                                                                                                                                                                                                                                                                                                                                                                                                                                                                                                                                                                                                                                                                                                                                                                                                                                                                                                                                                                                                                                                                                                                                                                                                                                                                                                                                                                                                                                                                                                                                                                                                                                                |                 |                             |    |      |  |
|---------------------------------------------------------------------------------------------------------|------------------------------------------------------------------------------------------------------------------------------------------------------------------------------------------------------------------------------------------------------------------------------------------------------------------------------------------------------------------------------------------------------------------------------------------------------------------------------------------------------------------------------------------------------------------------------------------------------------------------------------------------------------------------------------------------------------------------------------------------------------------------------------------------------------------------------------------------------------------------------------------------------------------------------------------------------------------------------------------------------------------------------------------------------------------------------------------------------------------------------------------------------------------------------------------------------------------------------------------------------------------------------------------------------------------------------------------------------------------------------------------------------------------------------------------------------------------------------------------------------------------------------------------------------------------------------------------------------------------------------------------------------------------------------------------------------------------------------------------------|-----------------|-----------------------------|----|------|--|
|                                                                                                         | nom. illeg.; <i>Salvia coarctata</i><br>Vahl, Enum. Pl. Obs. 1: 253<br>(1804); <i>Salvia simsiana</i><br>Schult., Mant. 1: 210 (1822);<br><i>Salvia calostachya</i> Gand., Fl.<br>Lyon.: 171 (1875); <i>Salvia</i><br><i>sclarea</i> var. <i>calostachya</i><br>(Gand.) Nyman, Consp. Fl.<br>Eur.: 569 (1881); <i>Salvia turke-</i><br><i>stanica</i> Noter, Rev. Hort.<br>(Paris) 77: 502 (1905); <i>Salvia</i><br><i>sclarea</i> var. <i>turkestaniana</i><br>Mottet, Rev. Hort. (Paris) 79:<br>135 (1907); <i>Salvia lucana</i><br>Cavara & Grande, Bull. Orto<br>Bot. Regia Univ. Napoli 3:<br>436 (1913); <i>Salvia pamirica</i><br>Gand., Bull. Soc. Bot. France<br>60: 26 (1913); <i>Salvia altilabrosa</i><br>Pan, Trab. Mus. Ci. Nat., Ser.<br>Bot. 14: 33 (1918).<br>Homotypic Names: <i>Salvia</i><br><i>pratensis</i> var. <i>sclareoides</i><br>(Brot.) Briq., Lab. Alp. Mar.:<br>532 (1895). Heterotypic Syno-<br>nyms: <i>Sclarea lusitanica</i> Mill.,<br>Gard. Dict. ed. 8: n.º 3 (1768).<br><i>Salvia bullata</i> Vahl, Enum. Pl.<br>Obs. 1: 265 (1804), nom. illeg.<br><i>Salvia lusitanica</i> Poir. in<br>J.B.A.M.de Lamarck, Encycl.<br>6: 606 (1805). <i>Salvia elongata</i><br>Spreng., Pl. Min. Cogn. Pug.<br>1: 3 (1813), nom. illeg. <i>Salvia</i><br><i>lusitanica</i> J.Jacq., Ecl. Pl. Rar.<br>1: 47 (1813), sensu auct.<br><i>Salvia baetica</i> Boiss., Elench.<br>Pl. Nov.: 73 (1838). <i>Salvia</i><br><i>pratensis</i> var. <i>bullata</i> Briq.,<br>Lab. Alp. Mar.: 531 (1895).<br><i>Salvia pratensis</i> var. <i>lusitanica</i><br>Briq., Lab. Alp. Mar.: 532<br>(1895). <i>Salvia sclareoides</i> var.<br><i>baetica</i> (Boiss.) Figuerola,<br>Collect. Bot. (Barcelona) 17:<br>309 (1988 publ. 1989). |                 |                             |    |      |  |
| <b><i>Salvia</i><br/><i>sclareoides</i><br/>Brot., Fl. Lu-<br/>sit. 1: 17<br/>(1804)</b>                |                                                                                                                                                                                                                                                                                                                                                                                                                                                                                                                                                                                                                                                                                                                                                                                                                                                                                                                                                                                                                                                                                                                                                                                                                                                                                                                                                                                                                                                                                                                                                                                                                                                                                                                                                | aerial<br>parts | 0.3% of essen-<br>tial oil  | ND | [44] |  |
| <b><i>Salvia shari-<br/>fii</i> Rech.f. &amp;<br/>Esfand., Oes-<br/>terr. Bot. Z.<br/>99: 55 (1952)</b> | -                                                                                                                                                                                                                                                                                                                                                                                                                                                                                                                                                                                                                                                                                                                                                                                                                                                                                                                                                                                                                                                                                                                                                                                                                                                                                                                                                                                                                                                                                                                                                                                                                                                                                                                                              | seeds           | 21.9% of es-<br>sential oil | ND | [45] |  |

|  |  |                                         |  |  |  |  |
|--|--|-----------------------------------------|--|--|--|--|
|  |  | Heterotypic Synonyms:                   |  |  |  |  |
|  |  | <i>Salvia calvertii</i> Boiss., Fl.     |  |  |  |  |
|  |  | Orient. 4: 626 (1879). <i>Salvia</i>    |  |  |  |  |
|  |  | <i>staminea</i> subsp. <i>armeniaca</i> |  |  |  |  |
|  |  | Bordz., Trudy Bot. Sada Imp.            |  |  |  |  |
|  |  | Yur'evsk. Univ. 13: 22 (1912).          |  |  |  |  |
|  |  | <i>Salvia armeniaca</i> (Bordz.)        |  |  |  |  |
|  |  | Grossh., Beih. Bot. Centralbl.          |  |  |  |  |
|  |  | 44(2): 237 (1927). <i>Salvia</i>        |  |  |  |  |
|  |  | <i>kudjurica</i> Rech.f., Oesterr.      |  |  |  |  |
|  |  | Bot. Z. 99: 56 (1952). <i>Salvia</i>    |  |  |  |  |
|  |  | <i>transcaucasica</i> Pobed., Bot.      |  |  |  |  |
|  |  | Mater. Gerb. Bot. Inst.                 |  |  |  |  |
|  |  | Komarova Akad. Nauk                     |  |  |  |  |
|  |  | S.S.S.R. 21: 321 (1961).                |  |  |  |  |
|  |  | Heterotypic Synonyms: <i>Sal-</i>       |  |  |  |  |
|  |  | <i>via chlorophylla</i> Briq., Bull.    |  |  |  |  |
|  |  | Herb. Boissier, sér. 2, 3: 1080         |  |  |  |  |
|  |  | (1903). <i>Salvia xerobia</i> Briq.,    |  |  |  |  |
|  |  | Bull. Herb. Boissier, sér. 2, 3:        |  |  |  |  |
|  |  | 1076 (1903). <i>Salvia stenophylla</i>  |  |  |  |  |
|  |  | var. <i>subintegra</i> Skan in          |  |  |  |  |
|  |  | W.H.Harvey & auct. suc.                 |  |  |  |  |
|  |  | (eds.), Fl. Cap. 5(1): 326              |  |  |  |  |
|  |  | (1910). <i>Salvia pallida</i> Dinter,   |  |  |  |  |
|  |  | Repert. Spec. Nov. Regni                |  |  |  |  |
|  |  | Veg. 23: 227 (1926), nom.               |  |  |  |  |
|  |  | nud.                                    |  |  |  |  |
|  |  | Homotypic Names: <i>Hormi-</i>          |  |  |  |  |
|  |  | <i>num verticillatum</i> (L.) Mill.,    |  |  |  |  |
|  |  | Gard. Dict. ed. 8: n.º 3 (1768);        |  |  |  |  |
|  |  | <i>Covola verticillata</i> (L.) Medik., |  |  |  |  |
|  |  | Philos. Bot. 2: 67 (1791);              |  |  |  |  |
|  |  | <i>Hemisphace verticillata</i> (L.)     |  |  |  |  |
|  |  | Opiz, Seznam: 50 (1852);                |  |  |  |  |
|  |  | <i>Sphacopsis verticillata</i> (L.)     |  |  |  |  |
|  |  | Briq., Lab. Alp. Mar.: 184              |  |  |  |  |
|  |  | (1891)                                  |  |  |  |  |

<sup>a</sup> ND: not detected; NQ: isolated, but quantification non reported.

---

## References

1. Govaerts, R. World Checklist of Selected Plant Families. **2019**.
2. Veličković, D.; Randelović, N.; Ristić, M.; Šmelcerović, A.; Veličković, A.S. Chemical composition and antimicrobial action of the ethanol extracts of *Salvia pratensis* L., *Salvia glutinosa* L. and *Salvia aethiopis* L. *J. Serb. Chem. Soc.* **2002**, *67*, 639-646.
3. Morteza-Semnani, K.; Moshiri, K.; Akbarzadeh, M. The Essential Oil Composition of *Salvia multicaulis* Vahl. *J. Essent. Oil Bear. Pl.* **2005**, *8*, 6-10, doi:10.1080/0972060X.2005.10643412.
4. Couladis, M.; Tzakou, O.; Stojanovic, D.; Mimica-Dukic, N.; Jancic, R. The essential oil composition of *Salvia argentea* L. *Flavour Fragrance J.* **2001**, *16*, 227-229, doi:https://doi.org/10.1002/ffj.989.
5. Mirza, M.; Ahmadi, L. Composition of the Essential Oil of *Salvia atropatana* Bunge. *J. Essent. Oil Res.* **2000**, *12*, 575-576, doi:10.1080/10412905.2000.9712162.
6. Salimpour, F.; Mazooji, A.; Akhoondi, S. Chemotaxonomy of six *Salvia* species using essential oil composition markers. *J. Med. Plant. Res.* **2011**, *5*, 1795-1805.
7. Ulubelen, A.; Tan, N.; Topcu, G. Terpenoids from *Salvia candidissima* subsp. *candidissima*. *Phytochemistry* **1997**, *45*, 1221-1223.
8. Pitarokili, D.; Tzakou, O.; Loukis, A. Essential oil composition of *Salvia verticillata*, *S. verbenaca*, *S. glutinosa* and *S. candidissima* growing wild in Greece. *Flavour Fragrance J.* **2006**, *21*, 670-673, doi:https://doi.org/10.1002/ffj.1647.
9. Şen Utsukarci, B.; Gurda, B.; Bilgin, M.; Satana, D.; Demirci, B.; Tan, N.; Mat, A. Biological Activities of Various Extracts from *Salvia cassia* Sam. ex Rech.f. and Chemical Composition of Its Most Active Extract. *Rec. Nat. Prod.* **2019**, *13*, 24-36, doi:10.25135/rnp.68.18.02.090.
10. Duru, M.; Tel Çayan, G.; Öztürk, M.; Harmandar, M. Chemical Composition, Antioxidant and Anticholinesterase Activities of the Essential Oil of *Salvia chrysophylla* Staph. *Rec. Nat. Prod.* **2012**, *6*, 175.
11. Çulhaoğlu, B.; Yapar, G.; Dirmenci, T.; Topçu, G. Bioactive constituents of *Salvia chrysophylla* Stapf. *Nat. Prod. Res.* **2013**, *27*, 438-447, doi:10.1080/14786419.2012.734820.
12. Marongiu, B.; Porcedda, S.; Porta, G.D.; Reverchon, E. Extraction and isolation of *Salvia desoleana* and *Mentha spicata* subsp. *insularis* essential oils by supercritical CO<sub>2</sub>. *Flavour Fragrance J.* **2001**, *16*, 384-388, doi:https://doi.org/10.1002/ffj.1021.
13. Hasan, M.; Al-Jaber, H.; Al-Qudah, M.; Zarga, M. New sesterterpenoids and other constituents from *Salvia dominica* growing wild in Jordan. *Phytochem. Lett.* **2016**, *16*, 12-17, doi:10.1016/j.phytol.2016.02.009.
14. Topçu, G.; Öztürk, M.; Kuşman, T. Terpenoids, essential oil composition, fatty acid profile, and biological activities of Anatolian *Salvia fruticosa* Mill. *Turk. J. Chem.* **2013**, *37*, 619-632.
15. Pitarokili, D.; Tzakou, O.; Loukis, A.; Harvala, C. Volatile metabolites from *Salvia fruticosa* as antifungal agents in soilborne pathogens. *Journal of Agricultural and Food Chemistry* **2003**, *51*, 3294-3301, doi:10.1021/jf0211534.
16. Abou-Jawdah, Y.; Sobh, H.; Salameh, A. Antimycotic activities of selected plant flora, growing wild in Lebanon, against phytopathogenic fungi. *Journal of Agricultural and Food Chemistry* **2002**, *50*, 3208-3213, doi:10.1021/jf0115490.
17. Saeidnia, S.; Ghamarinia, M.; Gohari, A.R.; Shakeri, A. Terpenes From the Root of *Salvia hypoleuca* Benth. *Daru* **2012**, *20*, 66, doi:10.1186/2008-2231-20-66.
18. Böszörményi, A.; Héthelyi, E.; Farkas, A.; Horváth, G.; Papp, N.; Lemberkovics, E.; Szoke, E. Chemical and genetic relationships among sage (*Salvia officinalis* L.) cultivars and Judean sage (*Salvia judaica* Boiss.). *Journal of Agricultural and Food Chemistry* **2009**, *57*, 4663-4667, doi:10.1021/jf9005092.
19. Alonazi, M.A.; Jemel, I.; Moubayed, N.; Alwhibi, M.; El-Sayed, N.N.E.; Ben Bacha, A. Evaluation of the in vitro anti-inflammatory and cytotoxic potential of ethanolic and aqueous extracts of *Origanum syriacum* and *Salvia lanigera* leaves. *Environ. Sci. Pollut. Res. Int.* **2021**, *28*, 19890-19900, doi:10.1007/s11356-020-11961-z.
20. Ulubelen, A.; Topcu, G.; Sonmez, U.; Eris, C.; Ozgen, U. Norsesiterpenes and Diterpenes from the Aerial Parts of *Salvia limbata*. *Phytochemistry* **1996**, *43*, 431-434.
21. Rustaiyan, A.; Samadzadeh, M.; Habibi, Z.; Jakupovic, J. Two diterpenes with rearranged abietane skeletons from *Zhumeria majdae*. *Phytochemistry* **1995**, *39*, 163-165, doi:https://doi.org/10.1016/0031-9422(94)00692-M.
22. Zadali, R.; Nejad-Ebrahimi, S.; Hadjiakhoondi, A.; Fiengo, L.; D'Ambola, M.; De Vita, S.; Tofighi, Z.; Chini, M.G.; Bifulco, G.; De Tommasi, N. Diterpenoids from *Zhumeria majdae* roots as potential heat shock protein 90 (HSP90) modulators. *Phytochemistry* **2021**, *185*, 112685, doi:https://doi.org/10.1016/j.phytochem.2021.112685.
23. Javidnia, K.; Moein, M.R.; Ayatollahi, M.; Moein, S.; Amoozegar, Z.; Rustaiyan, A. Constituents of Stem Oil of *Zhumeria majdae* Rech. from Iran. *J. Essent. Oil Res.* **2006**, *18*, 91-92, doi:10.1080/10412905.2006.9699395.
24. Sefidkon, F.; Mirza, M.; Javidtash, I. Essential oil Composition of *Salvia macrosiphon* Boiss. from Iran. *J. Essent. Oil Bear. Pl.* **2005**, *8*, 126-129, doi:10.1080/0972060X.2005.10643431.
25. Abak, F.; Yildiz, G.; Atamov, V.; Kurkcuoglu, M. Composition of the Essential Oil of *Salvia montbretii* Benth. from Turkey. *Rec. Nat. Prod.* **2018**, *12*, 426-431, doi:http://dx.doi.org/10.25135/rnp.51.17.12.080.
26. Ulubelen, A.; Topcu, G.; Johansson, C.B. Norditerpenoids and diterpenoids from *Salvia multicaulis* with antituberculous activity. *Journal of Natural Products* **1997**, *60*, 1275-1280, doi:10.1021/np9700681.
27. Christensen, K.B.; Jørgensen, M.; Kotowska, D.; Petersen, R.K.; Kristiansen, K.; Christensen, L.P. Activation of the nuclear receptor PPAR $\gamma$  by metabolites isolated from sage (*Salvia officinalis* L.). *J. Ethnopharmacol.* **2010**, *132*, 127-133, doi:10.1016/j.jep.2010.07.054.

- 
28. Moreira, M.R.; Souza, A.B.; Moreira, M.A.; Bianchi, T.C.; Carneiro, L.J.; Estrela, F.T.; dos Santos, R.A.; Januário, A.H.; Martins, C.H.G.; Ambrosio, S.R.; et al. RP-HPLC analysis of manool-rich *Salvia officinalis* extract and its antimicrobial activity against bacteria associated with dental caries. *Rev. Bras. Farma.* **2013**, *23*, 870-876, doi:https://doi.org/10.1590/S0102-695X2013000600003.
  29. Nicoletta, H.D.; de Oliveira, P.F.; Munari, C.C.; Costa, G.F.; Moreira, M.R.; Veneziani, R.C.; Tavares, D.C. Differential effect of manool -a diterpene from *Salvia officinalis*, on genotoxicity induced by methyl methanesulfonate in V79 and HepG2 cells. *Food Chem. Toxicol.* **2014**, *72*, 8-12, doi:10.1016/j.fct.2014.06.025.
  30. Veličković, T.; Randjelović, V.; Ristić, S.; Veličković, S.; Šmelcerović, A. Chemical constituents and antimicrobial activity of the ethanol extracts obtained from the flower, leaf and stem of *Salvia officinalis* L. *J. Serb. Chem. Soc.* **2003**, *68*, 17-24.
  31. Ulubelen, A. Terpenoids from *Salvia palaestina*. *Phytochemistry* **1985**, *24*, 1386-1387.
  32. Ulaş Çolak, N.; Yıldırım, S.; Bozdeveci, A.; Yaylı, N.; Coskuncelebi, K.; Fandaklı, S.; Yaşar, A. Essential Oil Composition, Antimicrobial and Antioxidant Activities of *Salvia staminea*. *Rec. Nat. Prod.* **2017**, *12*, 86-94, doi:10.25135/rnp.08.17.03.013.
  33. Habibi, Z.; Yousefi, M.; Aghaie, H.R.; Salehi, P.; Masoudi, S.; Rustaiyan, A. Chemical Composition of Essential Oil of *Salvia persepolitana* Boiss. and *Salvia rhytidea* Benth. from Iran. *J. Essent. Oil Res.* **2008**, *20*, 1-3, doi:10.1080/10412905.2008.9699405.
  34. Kolak, U.; Hac1bekirp lu, I.; Öztürk, M.; Özgökçe, F.; Topçu, G.; Ulubelen, A. Antioxidant and anticholinesterase constituents of *Salvia poculata*. *Turk. J. Chem.* **2009**, *33*, 813-823.
  35. Fattahi, B.; Nazeri, V.; Kalantari, S.; Bonfill, M.; Fattahi, M. Essential oil variation in wild-growing populations of *Salvia reuterana* Boiss. collected from Iran: Using GC-MS and multivariate analysis. *Ind. Crop. Prod.* **2016**, *81*, 180-190, doi:https://doi.org/10.1016/j.indcrop.2015.11.061.
  36. Karamian, R.; Asadbegy, M.; Pakzad, R.; Ranjbar, M. Essential oil compositions and in vitro antioxidant and antibacterial activities of the methanol extracts of two *Salvia* species (Lamiaceae) from Iran. *International Journal of Agriculture and Crop Sciences (IJACS)* **2013**, *5*.
  37. Farimani, M.M.; Miran, M. Labdane diterpenoids from *Salvia reuterana*. *Phytochemistry* **2014**, *108*, 264-269, doi:10.1016/j.phytochem.2014.08.024.
  38. Viljoen, A.M.; Gono-Bwalya, A.; Kamatou, G.P.P.; Başer, K.H.C.; Demirci, B. The Essential Oil Composition and Chemotaxonomy of *Salvia stenophylla* and its Allies *S. repens* and *S. runcinata*. *J. Essent. Oil Res.* **2006**, *18*, 37-45, doi:10.1080/10412905.2006.12067117.
  39. Moghaddam, F.M.; Zaynizadeh, B.; Ruedi, P. Salvileucolide methylester, a sesterterpene from *Salvia Sahendica*. *Phytochemistry* **1995**, *39*, 715-716.
  40. Mofidi Tabatabaei, S.; Salehi, P.; Moridi Farimani, M.; Neuburger, M.; De Mieri, M.; Hamburger, M.; Nejad-Ebrahimi, S. A nor-diterpene from *Salvia sahendica* leaves. *Nat. Prod. Res.* **2017**, *31*, 1758-1765, doi:10.1080/14786419.2017.1290619.
  41. Nadir, M.; Rasheed, M.; Sherwani, S.K.; Kazmi, S.U.; Ahmad, V.U. Chemical and antimicrobial studies on the essential oil from *Salvia santolinifolia* Boiss. *Pak. J. Pharm. Sci.* **2013**, *26*, 39-52.
  42. Ulubelen, A.; Topcu, G.; Eriş, C.; Sönmez, U.; Kartal, M.; Kurucu, S.; Bozok-Johansson, C. Terpenoids from *Salvia sclarea*. *Phytochemistry* **1994**, *36*, 971-974, doi:10.1016/s0031-9422(00)90474-6.
  43. Noori, S.; Hassan, Z.M.; Mohammadi, M.; Habibi, Z.; Sohrabi, N.; Bayanolhagh, S. Sclareol modulates the Treg intra-tumoral infiltrated cell and inhibits tumor growth in vivo. *Cell. Immunol.* **2010**, *263*, 148-153, doi:10.1016/j.cellimm.2010.02.009.
  44. Sepahvand, R.; Delfan, B.; Ghanbarzadeh, S.; Rashidipour, M.; Veiskarami, G.H.; Ghasemian-Yadegari, J. Chemical composition, antioxidant activity and antibacterial effect of essential oil of the aerial parts of *Salvia sclareoides*. *Asian Pac. J. Trop. Med.* **2014**, *7s1*, S491-S496, doi:10.1016/s1995-7645(14)60280-7.
  45. Alipour-Gougeh, S.; Asgarpanah, J. Essential and fixed oil chemical compositions of the seeds from the endemic species *Salvia sharifii* Rech. F. & Esfand. *J. Chil. Chem. Soc* **2015**, *60*, 2695-2697, doi:10.4067/S0717-97072015000400012.
  46. Samadi, S.; fattahi, B. Study of Compounds of essential oil diversity of some populations of *Salvia staminea* Monthr et Auch. ex Benth in Iran. *TACL* **2014**, *4*, 50-56, doi:10.1080/22297928.2013.770673.
  47. Sonmez, U.; Topcu, G.; Ulubelen, A. Constituents of *Salvia verticillata*. *Turk. J. Chem.* **1997**, *21*, 376-382.
